# Supplementary material for: Antibacterial Activity on Orthopedic Clinical Isolates and Cytotoxicity of the Antimicrobial Peptide Dadapin-1
Source: MDPI journal article supplement (doi:10.3390/ijms24010779), 2023-01-02
Supplement: s1 [file s1]

**Table S1.** Number of replicated experiments with triplicated measurements performed for the evaluation of MIC

| Species                | Strain         | Origin                 | Medium      | OD          |                  | RLU         |                  |
|------------------------|----------------|------------------------|-------------|-------------|------------------|-------------|------------------|
|                        |                |                        |             | MIC (µg/mL) | Replicated tests | MIC (µg/mL) | Replicated tests |
| <i>S. aureus</i>       | ATCC25923      | Reference strain       | MHB II 100% | >500        | 2 times (n=6)    | >500        | 1 time (n=3)     |
|                        |                |                        | MHB 20%     | 7.8         | 2 time (n=6)     | 7.8         | 1 time (n=3)     |
|                        | <i>cra4030</i> | Clinical isolate (IOR) | MHB II 100% | >500        | 2 times (n=6)    | >500        | 1 time (n=3)     |
|                        |                |                        | MHB 20%     | 7.8         | 1 time (n=3)     | 15.6        | 1 time (n=3)     |
| <i>S. epidermidis</i>  | <i>cra4034</i> | Clinical isolate (IOR) | MHB II 100% | 250         | 4 times (n=12)   | 250         | 1 time (n=3)     |
|                        |                |                        | MHB 20%     | 3.9         | 1 time (n=3)     | 7.8         | 1 time (n=3)     |
|                        | <i>cra4029</i> | Clinical isolate (IOR) | MHB II 100% | 250-500     | 2 times (n=6)    | 250         | 1 time (n=3)     |
|                        |                |                        | MHB 20%     | ND          | 2 times (n=6)    | 7.8         | 2 times (n=6)    |
| <i>S. warneri</i>      | <i>cra3882</i> | Clinical isolate (IOR) | MHB II 100% | 31.3        | 1 time (n=3)     | 62.5        | 1 time (n=3)     |
|                        |                |                        | MHB 20%     | ND          | 1 time (n=3)     | 7.8         | 1 time (n=3)     |
| <i>S. lugdunensis</i>  | <i>cra4011</i> | Clinical isolate (IOR) | MHB II 100% | 62.5        | 1 time (n=3)     | 62.5        | 1 time (n=3)     |
|                        |                |                        | MHB 20%     | ND          | 2 times (n=6)    | ND          | 2 times (n=6)    |
| <i>S. haemolyticus</i> | <i>cra3885</i> | Clinical isolate (IOR) | MHB II 100% | 62.5        | 1 time (n=3)     | 62.5        | 1 time (n=3)     |
|                        |                |                        | MHB 20%     | ND          | 1 time (n=3)     | ND          | 1 time (n=3)     |
| <i>E. coli</i>         | <i>cra4038</i> | Clinical isolate (IOR) | MHB II 100% | >500        | 1 time (n=3)     | >500        | 1 time (n=3)     |
|                        |                |                        | MHB 20%     | 15.6        | 1 time (n=3)     | 31.3        | 1 time (n=3)     |
| <i>P. aeruginosa</i>   | <i>cra4010</i> | Clinical isolate (IOR) | MHB II 100% | >500        | 3 times (n=9)    | >500        | 1 time (n=3)     |
|                        |                |                        | MHB 20%     | 15.6-31.3*  | 3 times (n=9)    | 31.3-62.5** | 3 times (n=9)    |
|                        | <i>cra4004</i> | Clinical isolate (IOR) | MHB II 100% | >500        | 1 time (n=3)     | >500        | 1 time (n=3)     |
|                        |                |                        | MHB 20%     | 31.3        | 1 time (n=3)     | 31.3        | 1 time (n=3)     |

\* Two experiments provided a MIC of 15.6 and an experiment of 31.3 µg/mL; \*\* Two experiments provided a MIC of 31.3 and an experiment of 62.5 µg/mL.

**Table S2.** Experimental data from the 3 independent experiments on the cytotoxicity of Dadapin-1 in the presence of FBS: luminescence readings at different Dadapin-1 concentrations.

| Well | Row | [Dadapin-1](ug/mL) | Date       | Sample (RLU) | Blank (RLU) | Sample-Blank | Cell activity (%) |
|------|-----|--------------------|------------|--------------|-------------|--------------|-------------------|
| 1    | A   | 450.0              | 23.09.2022 | 7699850      | 449.5       | 7699400.5    | 81.08             |
| 1    | B   | 450.0              | 23.09.2022 | 8156380      | 449.5       | 8155930.5    | 85.89             |
| 1    | C   | 450.0              | 23.09.2022 | 8657350      | 449.5       | 8656900.5    | 91.16             |
| 2    | A   | 225.0              | 23.09.2022 | 7874880      | 449.5       | 7874430.5    | 82.92             |
| 2    | B   | 225.0              | 23.09.2022 | 8659550      | 449.5       | 8659100.5    | 91.19             |
| 2    | C   | 225.0              | 23.09.2022 | 9658150      | 449.5       | 9657700.5    | 101.70            |
| 3    | A   | 112.5              | 23.09.2022 | 9978880      | 449.5       | 9978430.5    | 105.08            |
| 3    | B   | 112.5              | 23.09.2022 | 10593900     | 449.5       | 10593450.5   | 111.56            |
| 3    | C   | 112.5              | 23.09.2022 | 11188100     | 449.5       | 11187650.5   | 117.81            |
| 4    | A   | 56.3               | 23.09.2022 | 10093000     | 449.5       | 10092550.5   | 106.28            |
| 4    | B   | 56.3               | 23.09.2022 | 10964300     | 449.5       | 10963850.5   | 115.46            |
| 4    | C   | 56.3               | 23.09.2022 | 11611400     | 449.5       | 11610950.5   | 122.27            |
| 5    | A   | 28.1               | 23.09.2022 | 9981410      | 449.5       | 9980960.5    | 105.11            |
| 5    | B   | 28.1               | 23.09.2022 | 10859300     | 449.5       | 10858850.5   | 114.35            |
| 5    | C   | 28.1               | 23.09.2022 | 10607600     | 449.5       | 10607150.5   | 111.70            |
| 6    | A   | 14.1               | 23.09.2022 | 10469000     | 449.5       | 10468550.5   | 110.24            |
| 6    | B   | 14.1               | 23.09.2022 | 10034900     | 449.5       | 10034450.5   | 105.67            |
| 6    | C   | 14.1               | 23.09.2022 | 10681600     | 449.5       | 10681150.5   | 112.48            |
| 7    | A   | 7.0                | 23.09.2022 | 10699600     | 449.5       | 10699150.5   | 112.67            |
| 7    | B   | 7.0                | 23.09.2022 | 10273600     | 449.5       | 10273150.5   | 108.18            |
| 7    | C   | 7.0                | 23.09.2022 | 10782300     | 449.5       | 10781850.5   | 113.54            |
| 8    | A   | 3.5                | 23.09.2022 | 9820690      | 449.5       | 9820240.5    | 103.41            |
| 8    | B   | 3.5                | 23.09.2022 | 10556900     | 449.5       | 10556450.5   | 111.17            |
| 8    | C   | 3.5                | 23.09.2022 | 11321400     | 449.5       | 11320950.5   | 119.22            |

|    |   |       |            |          |       |            |        |
|----|---|-------|------------|----------|-------|------------|--------|
| 9  | A | 1.8   | 23.09.2022 | 8409810  | 449.5 | 8409360.5  | 88.56  |
| 9  | B | 1.8   | 23.09.2022 | 9987160  | 449.5 | 9986710.5  | 105.17 |
| 9  | C | 1.8   | 23.09.2022 | 11129000 | 449.5 | 11128550.5 | 117.19 |
| 10 | A | 0.9   | 23.09.2022 | 10197100 | 449.5 | 10196650.5 | 107.38 |
| 10 | B | 0.9   | 23.09.2022 | 10609700 | 449.5 | 10609250.5 | 111.72 |
| 10 | C | 0.9   | 23.09.2022 | 10895100 | 449.5 | 10894650.5 | 114.73 |
| 11 | A | 0.4   | 23.09.2022 | 9775350  | 449.5 | 9774900.5  | 102.94 |
| 11 | B | 0.4   | 23.09.2022 | 10654300 | 449.5 | 10653850.5 | 112.19 |
| 11 | C | 0.4   | 23.09.2022 | 10856900 | 449.5 | 10856450.5 | 114.33 |
| 12 | A | 0.2   | 23.09.2022 | 9709620  | 449.5 | 9709170.5  | 102.24 |
| 12 | B | 0.2   | 23.09.2022 | 9666490  | 449.5 | 9666040.5  | 101.79 |
| 12 | C | 0.2   | 23.09.2022 | 9870080  | 449.5 | 9869630.5  | 103.93 |
| 1  | A | 450   | 28.09.2022 | 10232900 | 635.5 | 10232264.5 | 81.63  |
| 1  | B | 450   | 28.09.2022 | 11395800 | 635.5 | 11395164.5 | 90.90  |
| 1  | C | 450   | 28.09.2022 | 9661990  | 635.5 | 9661354.5  | 77.07  |
| 2  | A | 225   | 28.09.2022 | 12632400 | 635.5 | 12631764.5 | 100.77 |
| 2  | B | 225   | 28.09.2022 | 13264400 | 635.5 | 13263764.5 | 105.81 |
| 2  | C | 225   | 28.09.2022 | 12324400 | 635.5 | 12323764.5 | 98.31  |
| 3  | A | 112.5 | 28.09.2022 | 14125700 | 635.5 | 14125064.5 | 112.68 |
| 3  | B | 112.5 | 28.09.2022 | 15375600 | 635.5 | 15374964.5 | 122.65 |
| 3  | C | 112.5 | 28.09.2022 | 14339200 | 635.5 | 14338564.5 | 114.38 |
| 4  | A | 56.25 | 28.09.2022 | 15047800 | 635.5 | 15047164.5 | 120.04 |
| 4  | B | 56.25 | 28.09.2022 | 15152600 | 635.5 | 15151964.5 | 120.87 |
| 4  | C | 56.25 | 28.09.2022 | 14575400 | 635.5 | 14574764.5 | 116.27 |
| 5  | A | 28.1  | 28.09.2022 | 14721200 | 635.5 | 14720564.5 | 117.43 |
| 5  | B | 28.1  | 28.09.2022 | 15346600 | 635.5 | 15345964.5 | 122.42 |
| 5  | C | 28.1  | 28.09.2022 | 14084900 | 635.5 | 14084264.5 | 112.36 |
| 6  | A | 14.1  | 28.09.2022 | 14600100 | 635.5 | 14599464.5 | 116.47 |

|    |   |       |            |          |       |            |        |
|----|---|-------|------------|----------|-------|------------|--------|
| 6  | B | 14.1  | 28.09.2022 | 15379400 | 635.5 | 15378764.5 | 122.68 |
| 6  | C | 14.1  | 28.09.2022 | 14640800 | 635.5 | 14640164.5 | 116.79 |
| 7  | A | 7.0   | 28.09.2022 | 14829000 | 635.5 | 14828364.5 | 118.29 |
| 7  | B | 7.0   | 28.09.2022 | 14630200 | 635.5 | 14629564.5 | 116.71 |
| 7  | C | 7.0   | 28.09.2022 | 14585500 | 635.5 | 14584864.5 | 116.35 |
| 8  | A | 3.5   | 28.09.2022 | 14585100 | 635.5 | 14584464.5 | 116.35 |
| 8  | B | 3.5   | 28.09.2022 | 14418500 | 635.5 | 14417864.5 | 115.02 |
| 8  | C | 3.5   | 28.09.2022 | 14513900 | 635.5 | 14513264.5 | 115.78 |
| 9  | A | 1.8   | 28.09.2022 | 14300700 | 635.5 | 14300064.5 | 114.08 |
| 9  | B | 1.8   | 28.09.2022 | 14722800 | 635.5 | 14722164.5 | 117.44 |
| 9  | C | 1.8   | 28.09.2022 | 14296000 | 635.5 | 14295364.5 | 114.04 |
| 10 | A | 0.9   | 28.09.2022 | 14952700 | 635.5 | 14952064.5 | 119.28 |
| 10 | B | 0.9   | 28.09.2022 | 15397900 | 635.5 | 15397264.5 | 122.83 |
| 10 | C | 0.9   | 28.09.2022 | 15109200 | 635.5 | 15108564.5 | 120.53 |
| 11 | A | 0.4   | 28.09.2022 | 14898500 | 635.5 | 14897864.5 | 118.85 |
| 11 | B | 0.4   | 28.09.2022 | 15016800 | 635.5 | 15016164.5 | 119.79 |
| 11 | C | 0.4   | 28.09.2022 | 14191400 | 635.5 | 14190764.5 | 113.21 |
| 12 | A | 0.2   | 28.09.2022 | 14147700 | 635.5 | 14147064.5 | 112.86 |
| 12 | B | 0.2   | 28.09.2022 | 13961000 | 635.5 | 13960364.5 | 111.37 |
| 12 | C | 0.2   | 28.09.2022 | 14535300 | 635.5 | 14534664.5 | 115.95 |
| 1  | A | 450   | 7.10.2022  | 9681560  | 640.0 | 9680920.0  | 75.67  |
| 1  | B | 450   | 7.10.2022  | 9685180  | 640.0 | 9684540.0  | 75.70  |
| 1  | C | 450   | 7.10.2022  | 9121050  | 640.0 | 9120410.0  | 71.29  |
| 2  | A | 225   | 7.10.2022  | 11618200 | 640.0 | 11617560.0 | 90.81  |
| 2  | B | 225   | 7.10.2022  | 10761800 | 640.0 | 10761160.0 | 84.11  |
| 2  | C | 225   | 7.10.2022  | 11327500 | 640.0 | 11326860.0 | 88.54  |
| 3  | A | 112.5 | 7.10.2022  | 13187500 | 640.0 | 13186860.0 | 103.07 |
| 3  | B | 112.5 | 7.10.2022  | 12799300 | 640.0 | 12798660.0 | 100.04 |

|    |   |       |           |          |       |            |        |
|----|---|-------|-----------|----------|-------|------------|--------|
| 3  | C | 112.5 | 7.10.2022 | 12620700 | 640.0 | 12620060.0 | 98.64  |
| 4  | A | 56.25 | 7.10.2022 | 13432300 | 640.0 | 13431660.0 | 104.99 |
| 4  | B | 56.25 | 7.10.2022 | 13311200 | 640.0 | 13310560.0 | 104.04 |
| 4  | C | 56.25 | 7.10.2022 | 13096900 | 640.0 | 13096260.0 | 102.37 |
| 5  | A | 28.1  | 7.10.2022 | 13934500 | 640.0 | 13933860.0 | 108.91 |
| 5  | B | 28.1  | 7.10.2022 | 13444300 | 640.0 | 13443660.0 | 105.08 |
| 5  | C | 28.1  | 7.10.2022 | 13338600 | 640.0 | 13337960.0 | 104.26 |
| 6  | A | 14.1  | 7.10.2022 | 13784100 | 640.0 | 13783460.0 | 107.74 |
| 6  | B | 14.1  | 7.10.2022 | 13382800 | 640.0 | 13382160.0 | 104.60 |
| 6  | C | 14.1  | 7.10.2022 | 13427600 | 640.0 | 13426960.0 | 104.95 |
| 7  | A | 7.0   | 7.10.2022 | 14397900 | 640.0 | 14397260.0 | 112.54 |
| 7  | B | 7.0   | 7.10.2022 | 13485900 | 640.0 | 13485260.0 | 105.41 |
| 7  | C | 7.0   | 7.10.2022 | 13216800 | 640.0 | 13216160.0 | 103.30 |
| 8  | A | 3.5   | 7.10.2022 | 13518100 | 640.0 | 13517460.0 | 105.66 |
| 8  | B | 3.5   | 7.10.2022 | 12980200 | 640.0 | 12979560.0 | 101.45 |
| 8  | C | 3.5   | 7.10.2022 | 13139300 | 640.0 | 13138660.0 | 102.70 |
| 9  | A | 1.8   | 7.10.2022 | 13590500 | 640.0 | 13589860.0 | 106.22 |
| 9  | B | 1.8   | 7.10.2022 | 14156200 | 640.0 | 14155560.0 | 110.65 |
| 9  | C | 1.8   | 7.10.2022 | 14116000 | 640.0 | 14115360.0 | 110.33 |
| 10 | A | 0.9   | 7.10.2022 | 13584900 | 640.0 | 13584260.0 | 106.18 |
| 10 | B | 0.9   | 7.10.2022 | 14194200 | 640.0 | 14193560.0 | 110.94 |
| 10 | C | 0.9   | 7.10.2022 | 13479100 | 640.0 | 13478460.0 | 105.35 |
| 11 | A | 0.4   | 7.10.2022 | 13271200 | 640.0 | 13270560.0 | 103.73 |
| 11 | B | 0.4   | 7.10.2022 | 13912700 | 640.0 | 13912060.0 | 108.74 |
| 11 | C | 0.4   | 7.10.2022 | 14556200 | 640.0 | 14555560.0 | 113.77 |
| 12 | A | 0.2   | 7.10.2022 | 12879300 | 640.0 | 12878660.0 | 100.67 |
| 12 | B | 0.2   | 7.10.2022 | 14201600 | 640.0 | 14200960.0 | 111.00 |
| 12 | C | 0.2   | 7.10.2022 | 13729000 | 640.0 | 13728360.0 | 107.31 |

**Table S3.** Experimental data from the 3 independent experiments on the cytotoxicity of Dadapin-1 in the presence of FBS: luminescence readings of the controls

|     |                   |            |          |       |            |        |
|-----|-------------------|------------|----------|-------|------------|--------|
| 1 G | Reference Control | 23.09.2022 | 9232510  | 449.5 | 9232060.5  | 97.22  |
| 2 G |                   | 23.09.2022 | 9668150  | 449.5 | 9667700.5  | 101.81 |
| 3 G |                   | 23.09.2022 | 9558410  | 449.5 | 9557960.5  | 100.65 |
| 4 G |                   | 23.09.2022 | 9526830  | 449.5 | 9526380.5  | 100.32 |
| 1 G |                   | 28.09.2022 | 9842530  | 635.5 | 9841894.5  | 78.51  |
| 2 G |                   | 28.09.2022 | 13045300 | 635.5 | 13044664.5 | 104.06 |
| 3 G |                   | 28.09.2022 | 13870600 | 635.5 | 13869964.5 | 110.65 |
| 4 G |                   | 28.09.2022 | 13385600 | 635.5 | 13384964.5 | 106.78 |
| 1 G |                   | 7.10.2022  | 12171800 | 640.0 | 12171160.0 | 95.14  |
| 2 G |                   | 7.10.2022  | 12917700 | 640.0 | 12917060.0 | 100.97 |
| 3 G |                   | 7.10.2022  | 12472000 | 640.0 | 12471360.0 | 97.48  |
| 4 G |                   | 7.10.2022  | 13615200 | 640.0 | 13614560.0 | 106.42 |
| 5 G | Medium Control    | 23.09.2022 | 9675150  | 449.5 | 9674700.5  | 101.88 |
| 6 G |                   | 23.09.2022 | 10516600 | 449.5 | 10516150.5 | 110.74 |
| 7 G |                   | 23.09.2022 | 9934840  | 449.5 | 9934390.5  | 104.62 |
| 8 G |                   | 23.09.2022 | 9892810  | 449.5 | 9892360.5  | 104.17 |
| 5 G |                   | 28.09.2022 | 12108200 | 635.5 | 12107564.5 | 96.59  |
| 6 G |                   | 28.09.2022 | 13420900 | 635.5 | 13420264.5 | 107.06 |
| 7 G |                   | 28.09.2022 | 13309800 | 635.5 | 13309164.5 | 106.17 |
| 8 G |                   | 28.09.2022 | 12927600 | 635.5 | 12926964.5 | 103.12 |
| 5 G |                   | 7.10.2022  | 16924900 | 640.0 | 16924260.0 | 132.29 |
| 6 G |                   | 7.10.2022  | 16413600 | 640.0 | 16412960.0 | 128.29 |
| 7 G |                   | 7.10.2022  | 17477300 | 640.0 | 17476660.0 | 136.61 |
| 8 G |                   | 7.10.2022  | 17221800 | 640.0 | 17221160.0 | 134.61 |

|      |                  |            |      |       |        |      |
|------|------------------|------------|------|-------|--------|------|
| 9 G  | Positive Control | 23.09.2022 | 2858 | 449.5 | 2408.8 | 0.03 |
| 10 G |                  | 23.09.2022 | 696  | 449.5 | 246.5  | 0.00 |
| 11 G |                  | 23.09.2022 | 648  | 449.5 | 198.5  | 0.00 |
| 12 G |                  | 23.09.2022 | 1038 | 449.5 | 588.5  | 0.01 |
| 9 G  |                  | 28.09.2022 | 4319 | 635.5 | 3683.2 | 0.03 |
| 10 G |                  | 28.09.2022 | 1680 | 635.5 | 1044.6 | 0.01 |
| 11 G |                  | 28.09.2022 | 1594 | 635.5 | 958.6  | 0.01 |
| 12 G |                  | 28.09.2022 | 1488 | 635.5 | 852.6  | 0.01 |
| 9 G  |                  | 7.10.2022  | 5411 | 640.0 | 4771.2 | 0.04 |
| 10 G |                  | 7.10.2022  | 1486 | 640.0 | 846.1  | 0.01 |
| 11 G |                  | 7.10.2022  | 1518 | 640.0 | 878.1  | 0.01 |
| 12 G |                  | 7.10.2022  | 1646 | 640.0 | 1006.1 | 0.01 |

**Table S4.** Experimental data from the 3 independent experiments on the cytotoxicity of Dadapin-1 in the presence of FBS: summary table with statistics from all three experiments.

| Dadapin-1<br>[µg/mL] | % CELL ACTIVITY |      | RLU        |           |
|----------------------|-----------------|------|------------|-----------|
|                      | Mean (%)        | S.D. | Mean (RLU) | S.D.      |
| 450.0                | 81.2            | 7.0  | 9365209.4  | 1115837.8 |
| 225.0                | 93.8            | 8.1  | 10901789.4 | 1838778.6 |
| 112.5                | 109.5           | 8.3  | 12689300.5 | 1811593.1 |
| 56.3                 | 112.5           | 8.0  | 13031080.5 | 1806712.9 |
| 28.1                 | 111.3           | 6.2  | 12923692.8 | 1942778.6 |
| 14.1                 | 111.3           | 6.3  | 12932791.6 | 2012095.6 |
| 7.0                  | 111.9           | 5.2  | 12988402.8 | 1883922.9 |
| 3.5                  | 110.1           | 6.8  | 12760990.5 | 1784836.4 |
| 1.8                  | 109.3           | 8.9  | 12744777.2 | 2300305.1 |
| 0.9                  | 113.2           | 6.5  | 13157191.6 | 2054960.8 |
| 0.4                  | 111.9           | 5.9  | 13014241.6 | 2028183.2 |
| 0.2                  | 107.5           | 5.6  | 12521657.2 | 2129129.5 |

**Table S5.** Experimental data from the 3 independent experiments on the cytotoxicity of Dadapin-1 in the presence of FBS: cell metabolic activity for the treatments plotted in **Figure 2**.

|                         | Mean (% cell activity) | S.D. |
|-------------------------|------------------------|------|
| Reference control       | 100.0                  | 8.1  |
| Medium control          | 113.8                  | 14.6 |
| Positive control        | 0.01                   | 0.01 |
| Dadapin-1 (112.5 µg/mL) | 109.5                  | 8.3  |
| Dadapin-1 (225 µg/mL)   | 93.8                   | 8.1  |
| Dadapin-1 (450 µg/mL)   | 81.2                   | 7.0  |



**Table S6.** Experimental data from the 2 independent experiments on the cytotoxicity of Dadapin-1 in the absence of FBS: luminescence readings at different Dadapin-1 concentrations.

| Well | Row | [Dadapin-1](ug/mL) | Data       | Sample (RLU) | Blank (RLU) | Sample-Blank | Cell activity (%) |
|------|-----|--------------------|------------|--------------|-------------|--------------|-------------------|
| 1    | A   | 450.0              | 21.12.2022 | 2235950      | 311.5       | 2235638.5    | 22.18             |
| 1    | B   | 450.0              | 21.12.2022 | 1748910      | 311.5       | 1748598.5    | 17.35             |
| 1    | C   | 450.0              | 21.12.2022 | 1712860      | 311.5       | 1712548.5    | 16.99             |
| 2    | A   | 225.0              | 21.12.2022 | 6948510      | 311.5       | 6948198.5    | 68.93             |
| 2    | B   | 225.0              | 21.12.2022 | 6857870      | 311.5       | 6857558.5    | 68.03             |
| 2    | C   | 225.0              | 21.12.2022 | 6678080      | 311.5       | 6677768.5    | 66.25             |
| 3    | A   | 112.5              | 21.12.2022 | 8462910      | 311.5       | 8462598.5    | 83.95             |
| 3    | B   | 112.5              | 21.12.2022 | 8595040      | 311.5       | 8594728.5    | 85.26             |
| 3    | C   | 112.5              | 21.12.2022 | 8122820      | 311.5       | 8122508.5    | 80.58             |
| 4    | A   | 56.3               | 21.12.2022 | 9532850      | 311.5       | 9532538.5    | 94.57             |
| 4    | B   | 56.3               | 21.12.2022 | 9300780      | 311.5       | 9300468.5    | 92.26             |
| 4    | C   | 56.3               | 21.12.2022 | 9165660      | 311.5       | 9165348.5    | 90.92             |
| 5    | A   | 28.1               | 21.12.2022 | 10000300     | 311.5       | 9999988.5    | 99.20             |
| 5    | B   | 28.1               | 21.12.2022 | 9965060      | 311.5       | 9964748.5    | 98.85             |
| 5    | C   | 28.1               | 21.12.2022 | 9112850      | 311.5       | 9112538.5    | 90.40             |
| 6    | A   | 14.1               | 21.12.2022 | 9570010      | 311.5       | 9569698.5    | 94.94             |
| 6    | B   | 14.1               | 21.12.2022 | 9114950      | 311.5       | 9114638.5    | 90.42             |
| 6    | C   | 14.1               | 21.12.2022 | 9003150      | 311.5       | 9002838.5    | 89.31             |
| 7    | A   | 7.0                | 21.12.2022 | 9081670      | 311.5       | 9081358.5    | 90.09             |
| 7    | B   | 7.0                | 21.12.2022 | 9497790      | 311.5       | 9497478.5    | 94.22             |
| 7    | C   | 7.0                | 21.12.2022 | 8848810      | 311.5       | 8848498.5    | 87.78             |
| 8    | A   | 3.5                | 21.12.2022 | 9028390      | 311.5       | 9028078.5    | 89.56             |
| 8    | B   | 3.5                | 21.12.2022 | 9891390      | 311.5       | 9891078.5    | 98.12             |

|    |   |       |            |          |       |            |        |
|----|---|-------|------------|----------|-------|------------|--------|
| 8  | C | 3.5   | 21.12.2022 | 9003810  | 311.5 | 9003498.5  | 89.32  |
| 9  | A | 1.8   | 21.12.2022 | 8922210  | 311.5 | 8921898.5  | 88.51  |
| 9  | B | 1.8   | 21.12.2022 | 9354290  | 311.5 | 9353978.5  | 92.80  |
| 9  | C | 1.8   | 21.12.2022 | 8880370  | 311.5 | 8880058.5  | 88.09  |
| 10 | A | 0.9   | 21.12.2022 | 9008300  | 311.5 | 9007988.5  | 89.36  |
| 10 | B | 0.9   | 21.12.2022 | 9138000  | 311.5 | 9137688.5  | 90.65  |
| 10 | C | 0.9   | 21.12.2022 | 8283040  | 311.5 | 8282728.5  | 82.17  |
| 11 | A | 0.4   | 21.12.2022 | 8319240  | 311.5 | 8318928.5  | 82.53  |
| 11 | B | 0.4   | 21.12.2022 | 9218890  | 311.5 | 9218578.5  | 91.45  |
| 11 | C | 0.4   | 21.12.2022 | 8251220  | 311.5 | 8250908.5  | 81.85  |
| 12 | A | 0.2   | 21.12.2022 | 8091570  | 311.5 | 8091258.5  | 80.27  |
| 12 | B | 0.2   | 21.12.2022 | 9055360  | 311.5 | 9055048.5  | 89.83  |
| 12 | C | 0.2   | 21.12.2022 | 7982240  | 311.5 | 7981928.5  | 79.18  |
| 1  | A | 450   | 23.12.2022 | 2850230  | 237.0 | 2849993.0  | 37.21  |
| 1  | B | 450   | 23.12.2022 | 2400650  | 237.0 | 2400413.0  | 31.34  |
| 1  | C | 450   | 23.12.2022 | 2521500  | 237.0 | 2521263.0  | 32.92  |
| 2  | A | 225   | 23.12.2022 | 7600970  | 237.0 | 7600733.0  | 99.25  |
| 2  | B | 225   | 23.12.2022 | 7320680  | 237.0 | 7320443.0  | 95.59  |
| 2  | C | 225   | 23.12.2022 | 7492800  | 237.0 | 7492563.0  | 97.83  |
| 3  | A | 112.5 | 23.12.2022 | 8604410  | 237.0 | 8604173.0  | 112.35 |
| 3  | B | 112.5 | 23.12.2022 | 8607640  | 237.0 | 8607403.0  | 112.39 |
| 3  | C | 112.5 | 23.12.2022 | 9030690  | 237.0 | 9030453.0  | 117.91 |
| 4  | A | 56.25 | 23.12.2022 | 9443670  | 237.0 | 9443433.0  | 123.31 |
| 4  | B | 56.25 | 23.12.2022 | 10232300 | 237.0 | 10232063.0 | 133.60 |
| 4  | C | 56.25 | 23.12.2022 | 9876340  | 237.0 | 9876103.0  | 128.96 |
| 5  | A | 28.1  | 23.12.2022 | 9746920  | 237.0 | 9746683.0  | 127.27 |
| 5  | B | 28.1  | 23.12.2022 | 10303300 | 237.0 | 10303063.0 | 134.53 |
| 5  | C | 28.1  | 23.12.2022 | 10467300 | 237.0 | 10467063.0 | 136.67 |

|    |   |      |            |          |       |            |        |
|----|---|------|------------|----------|-------|------------|--------|
| 6  | A | 14.1 | 23.12.2022 | 9515940  | 237.0 | 9515703.0  | 124.25 |
| 6  | B | 14.1 | 23.12.2022 | 10364200 | 237.0 | 10363963.0 | 135.33 |
| 6  | C | 14.1 | 23.12.2022 | 9964630  | 237.0 | 9964393.0  | 130.11 |
| 7  | A | 7.0  | 23.12.2022 | 9825840  | 237.0 | 9825603.0  | 128.30 |
| 7  | B | 7.0  | 23.12.2022 | 10225600 | 237.0 | 10225363.0 | 133.52 |
| 7  | C | 7.0  | 23.12.2022 | 10528500 | 237.0 | 10528263.0 | 137.47 |
| 8  | A | 3.5  | 23.12.2022 | 9719500  | 237.0 | 9719263.0  | 126.91 |
| 8  | B | 3.5  | 23.12.2022 | 10339900 | 237.0 | 10339663.0 | 135.01 |
| 8  | C | 3.5  | 23.12.2022 | 9724780  | 237.0 | 9724543.0  | 126.98 |
| 9  | A | 1.8  | 23.12.2022 | 9359080  | 237.0 | 9358843.0  | 122.20 |
| 9  | B | 1.8  | 23.12.2022 | 9537550  | 237.0 | 9537313.0  | 124.53 |
| 9  | C | 1.8  | 23.12.2022 | 10311300 | 237.0 | 10311063.0 | 134.63 |
| 10 | A | 0.9  | 23.12.2022 | 9709820  | 237.0 | 9709583.0  | 126.78 |
| 10 | B | 0.9  | 23.12.2022 | 9698620  | 237.0 | 9698383.0  | 126.63 |
| 10 | C | 0.9  | 23.12.2022 | 9945860  | 237.0 | 9945623.0  | 129.86 |
| 11 | A | 0.4  | 23.12.2022 | 9300720  | 237.0 | 9300483.0  | 121.44 |
| 11 | B | 0.4  | 23.12.2022 | 9263040  | 237.0 | 9262803.0  | 120.95 |
| 11 | C | 0.4  | 23.12.2022 | 9701410  | 237.0 | 9701173.0  | 126.67 |
| 12 | A | 0.2  | 23.12.2022 | 9286840  | 237.0 | 9286603.0  | 121.26 |
| 12 | B | 0.2  | 23.12.2022 | 10622500 | 237.0 | 10622263.0 | 138.70 |
| 12 | C | 0.2  | 23.12.2022 | 9802870  | 237.0 | 9802633.0  | 128.00 |

**Table S7.** Experimental data from the 2 independent experiments on the cytotoxicity of Dadapin-1 in the absence of FBS: luminescence readings of the controls.

|                          |            |          |       |            |        |        |
|--------------------------|------------|----------|-------|------------|--------|--------|
| <b>Reference Control</b> | 21.12.2022 | 10219300 | 311.5 | 10218988.5 | 101.38 |        |
|                          | 21.12.2022 | 10613200 | 311.5 | 10612888.5 | 105.28 |        |
|                          | 21.12.2022 | 9296840  | 311.5 | 9296528.5  | 92.23  |        |
|                          | 21.12.2022 | 10192900 | 311.5 | 10192588.5 | 101.11 | 100.00 |
|                          | 23.12.2022 | 6833410  | 237.0 | 6833173.0  | 89.22  |        |
|                          | 23.12.2022 | 7700940  | 237.0 | 7700703.0  | 100.55 |        |
|                          | 23.12.2022 | 7956100  | 237.0 | 7955863.0  | 103.88 |        |
|                          | 23.12.2022 | 8144710  | 237.0 | 8144473.0  | 106.34 | 100.00 |
| <b>Medium Control</b>    | 21.12.2022 | 9813790  | 311.5 | 9813478.5  | 97.35  |        |
|                          | 21.12.2022 | 9776870  | 311.5 | 9776558.5  | 96.99  |        |
|                          | 21.12.2022 | 10479000 | 311.5 | 10478688.5 | 103.95 |        |
|                          | 21.12.2022 | 9328500  | 311.5 | 9328188.5  | 92.54  | 97.71  |
|                          | 23.12.2022 | 8272570  | 237.0 | 8272333.0  | 108.01 |        |
|                          | 23.12.2022 | 8018250  | 237.0 | 8018013.0  | 104.69 |        |
|                          | 23.12.2022 | 8502740  | 237.0 | 8502503.0  | 111.02 |        |
|                          | 23.12.2022 | 8370250  | 237.0 | 8370013.0  | 109.29 | 108.25 |
| <b>Positive Control</b>  | 21.12.2022 | 31587    | 311.5 | 31275.4    | 0.31   |        |
|                          | 21.12.2022 | 30406    | 311.5 | 30094.4    | 0.30   |        |
|                          | 21.12.2022 | 23300    | 311.5 | 22988.7    | 0.23   |        |
|                          | 21.12.2022 | 16287    | 311.5 | 15975.4    | 0.16   | 0.25   |
|                          | 23.12.2022 | 39213    | 237.0 | 38975.9    | 0.51   |        |
|                          | 23.12.2022 | 19640    | 237.0 | 19402.8    | 0.25   |        |
|                          | 23.12.2022 | 16553    | 237.0 | 16316.2    | 0.21   |        |
|                          | 23.12.2022 | 13161    | 237.0 | 12924.1    | 0.17   | 0.29   |

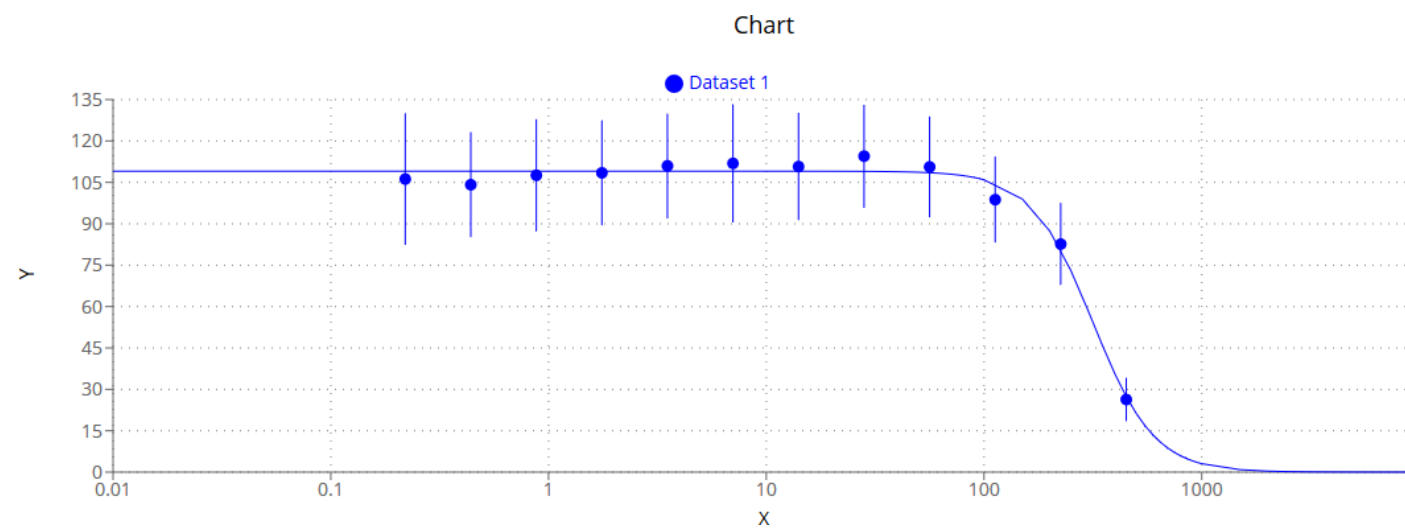

**Figure S1.** This chart shows the regression curve achieved by Quest Graph™ IC50 Calculator with the cytotoxicity data obtained testing Dadapin-1 on MG63 cells in the absence of FBS. On the X-axis the Dadapin-1 concentration values are reported in  $\mu\text{g/mL}$ , while the values on the Y-axis represent the percentage of metabolic activity with respect to the Reference control equated to 100%.
